# Supplementary material for: Synthesis and Antioxidant Activity of New Catechol Thioethers with the Methylene Linker
Source: MDPI journal article supplement (doi:10.3390/molecules27103169), 2022-05-16
Supplement: s1 [file s1]

## Supplementary materials

### Synthesis and antioxidant activity of new catechol thioethers with the methylene linker

Ivan V. Smolyaninov<sup>\*,1</sup>, Daria A. Burmistrova<sup>1</sup>, Maxim V. Arsenyev<sup>2</sup>, Maria A. Polovinkina<sup>3</sup>, Nadezhda P. Pomortseva<sup>1</sup>, Georgy K. Fukin<sup>2</sup>, Andrey I. Poddel'sky<sup>\*,2</sup>, Nadezhda T. Berberova<sup>1</sup>

<sup>1</sup> Department of Chemistry, Astrakhan State Technical University, 16 Tatisheva str., Astrakhan, 414056, Russia

<sup>2</sup> G.A. Razuvaev Institute of Organometallic Chemistry, Russian Academy of Sciences, 49 Tropinina str., 603137, Nizhny Novgorod, Russia

<sup>3</sup> Toxicology research group of Southern Scientific Centre of Russian Academy of Science, 41 Chekhova str., Rostov-on-Don, 344006, Russia

#### Content:

|                                                                                                          |    |
|----------------------------------------------------------------------------------------------------------|----|
| Figure S1. The <sup>1</sup> H NMR spectrum of <b>1</b> (200 MHz, DMSO-d <sub>6</sub> )                   | S3 |
| Figure S2. The <sup>13</sup> C{ <sup>1</sup> H} NMR spectrum of <b>1</b> (50 MHz, DMSO-d <sub>6</sub> )  | S3 |
| Figure S3. The <sup>1</sup> H NMR spectrum of <b>2</b> (200 MHz, CDCl <sub>3</sub> )                     | S4 |
| Figure S4. The <sup>13</sup> C{ <sup>1</sup> H} NMR spectrum of <b>2</b> (50 MHz, CDCl <sub>3</sub> )    | S4 |
| Figure S5. The <sup>1</sup> H NMR spectrum of <b>4</b> (200 MHz, CDCl <sub>3</sub> )                     | S5 |
| Figure S6. The <sup>13</sup> C{ <sup>1</sup> H} NMR spectrum of <b>4</b> (50 MHz, CDCl <sub>3</sub> )    | S5 |
| Figure S7. The <sup>1</sup> H NMR spectrum of <b>5</b> (400 MHz, CDCl <sub>3</sub> )                     | S6 |
| Figure S8. The <sup>13</sup> C{ <sup>1</sup> H} NMR spectrum of <b>5</b> (100 MHz, CDCl <sub>3</sub> )   | S6 |
| Figure S9. The <sup>1</sup> H NMR spectrum of <b>6</b> (200 MHz, DMSO-d <sub>6</sub> )                   | S7 |
| Figure S10. The <sup>13</sup> C{ <sup>1</sup> H} NMR spectrum of <b>6</b> (50 MHz, DMSO-d <sub>6</sub> ) | S7 |
| Figure S11. The <sup>1</sup> H NMR spectrum of <b>7</b> (200 MHz, CDCl <sub>3</sub> )                    | S8 |
| Figure S12. The <sup>13</sup> C{ <sup>1</sup> H} NMR spectrum of <b>7</b> (50 MHz, CDCl <sub>3</sub> )   | S8 |
| Figure S13. The <sup>1</sup> H NMR spectrum of <b>8</b> (200 MHz, CDCl <sub>3</sub> )                    | S9 |

|                                                                                                             |     |
|-------------------------------------------------------------------------------------------------------------|-----|
| Figure S14. The $^{13}\text{C}\{^1\text{H}\}$ NMR spectrum of <b>8</b> (50 MHz, $\text{CDCl}_3$ ) . . .     | S9  |
| Figure S15. The $^1\text{H}$ NMR spectrum of <b>9</b> (400 MHz, $\text{CDCl}_3$ ) . . .                     | S10 |
| Figure S16. The $^{13}\text{C}\{^1\text{H}\}$ NMR spectrum of <b>9</b> (100 MHz, $\text{CDCl}_3$ ) . . .    | S10 |
| Figure S17. The $^1\text{H}$ NMR spectrum of <b>10</b> (200 MHz, $\text{CDCl}_3$ ) . . .                    | S11 |
| Figure S18. The $^{13}\text{C}\{^1\text{H}\}$ NMR spectrum of <b>10</b> (50 MHz, $\text{CDCl}_3$ ) . . .    | S11 |
| Figure S19. The $^1\text{H}$ NMR spectrum of <b>11</b> (400 MHz, $\text{DMSO-d}_6$ ) . . .                  | S12 |
| Figure S20. The $^{13}\text{C}\{^1\text{H}\}$ NMR spectrum of <b>11</b> (100 MHz, $\text{DMSO-d}_6$ ) . . . | S12 |
| Figure S21. The $^1\text{H}$ NMR spectrum of <b>12</b> (400 MHz, $\text{CDCl}_3$ ) . . .                    | S13 |
| Figure S22. The $^{13}\text{C}\{^1\text{H}\}$ NMR spectrum of <b>12</b> (100 MHz, $\text{CDCl}_3$ ) . . .   | S13 |
| Figure S23. The $^1\text{H}$ NMR spectrum of <b>13</b> (400 MHz, $\text{DMSO-d}_6$ ) . . .                  | S14 |
| Figure S24. The $^{13}\text{C}\{^1\text{H}\}$ NMR spectrum of <b>13</b> (100 MHz, $\text{DMSO-d}_6$ ) . . . | S14 |
| Figure S25. The $^1\text{H}$ NMR spectrum of <b>14</b> (400 MHz, $\text{CDCl}_3$ ) . . .                    | S15 |
| Figure S26. The $^{13}\text{C}\{^1\text{H}\}$ NMR spectrum of <b>14</b> (100 MHz, $\text{CDCl}_3$ ) . . .   | S15 |
| Figure S27. The $^1\text{H}$ NMR spectrum of <b>15</b> (400 MHz, $\text{CDCl}_3$ ) . . .                    | S16 |
| Figure S28. The $^{13}\text{C}\{^1\text{H}\}$ NMR spectrum of <b>15</b> (100 MHz, $\text{CDCl}_3$ ) . . .   | S16 |
| Table S1. Crystal data and structure refinement for <b>8</b> and <b>15</b> . . .                            | S17 |

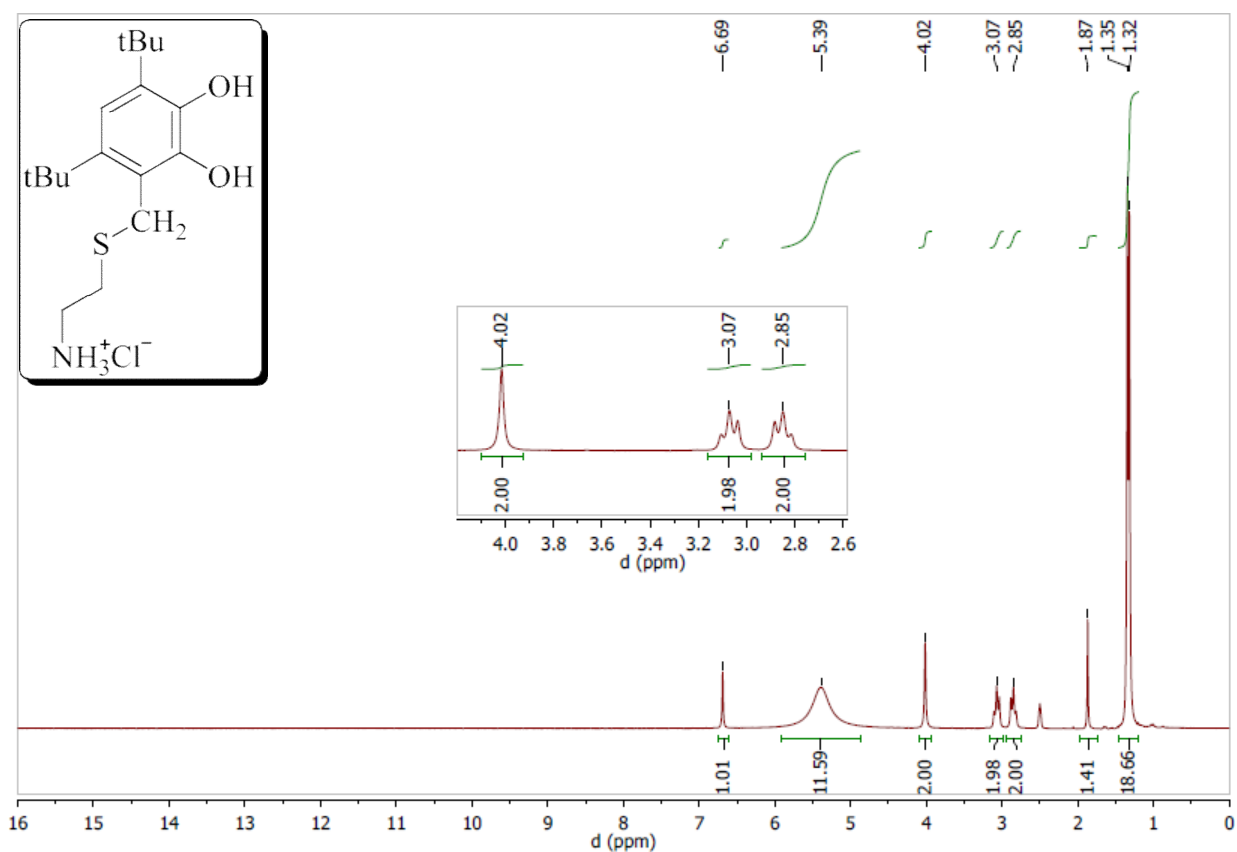

Figure S1. The <sup>1</sup>H NMR spectrum of **1** (200 MHz, DMSO-d<sub>6</sub>).

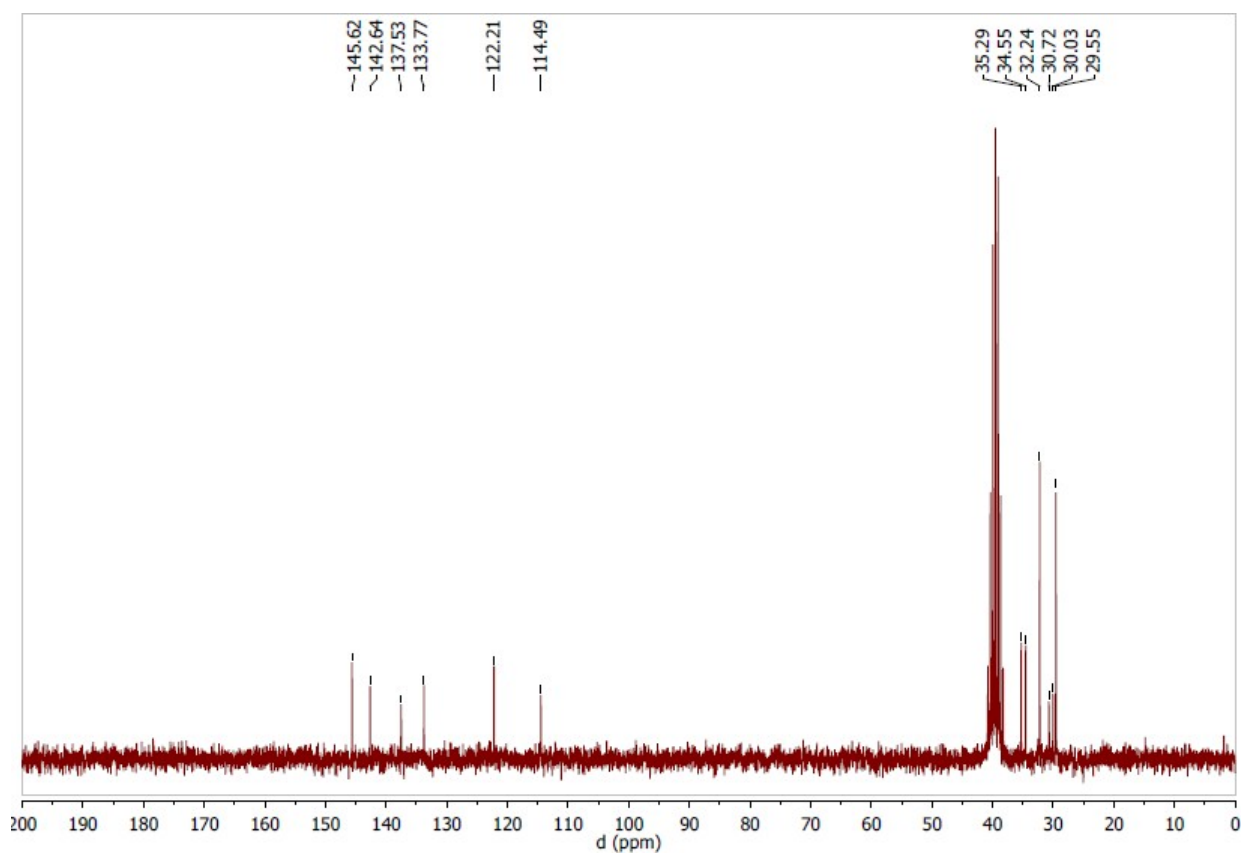

Figure S2. The <sup>13</sup>C{<sup>1</sup>H} NMR spectrum of **1** (50 MHz, DMSO-d<sub>6</sub>).

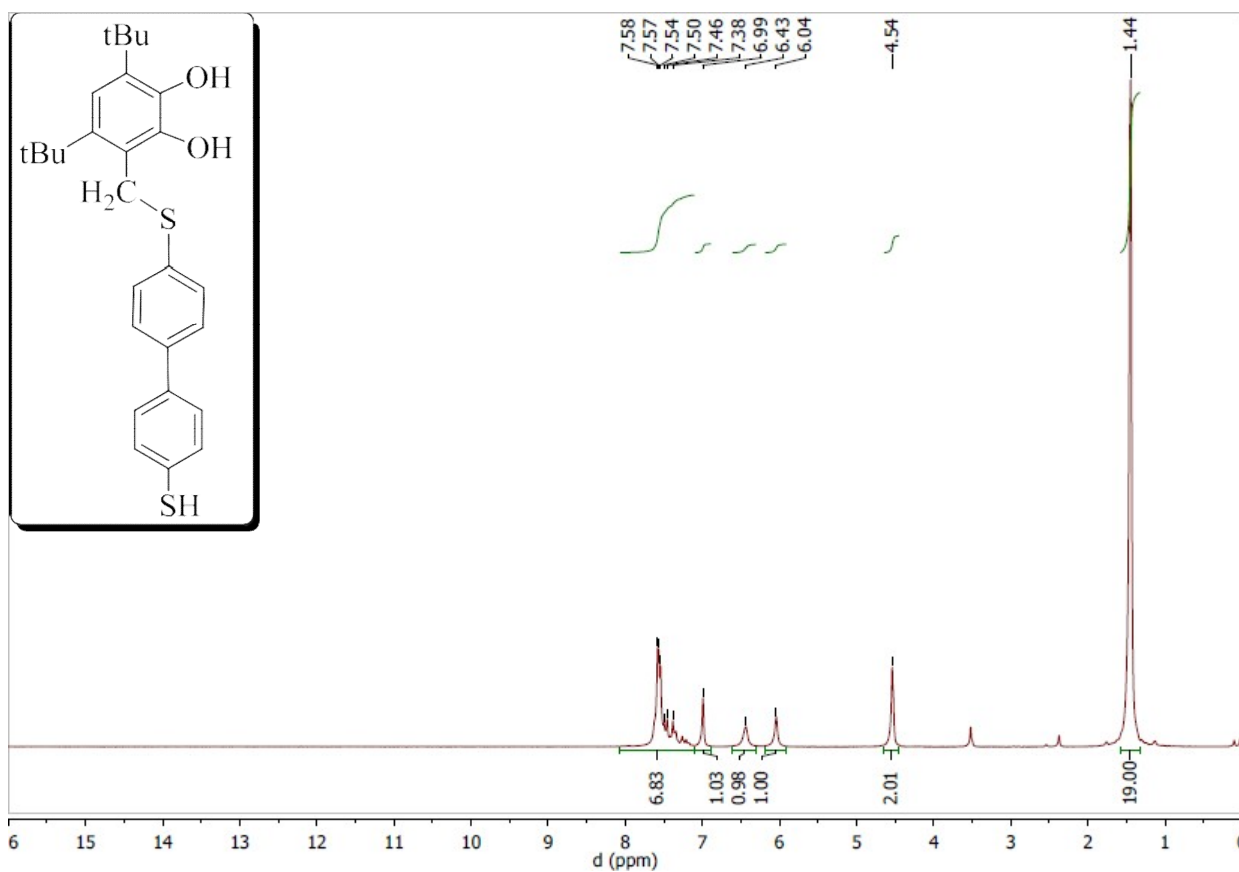

Figure S3. The <sup>1</sup>H NMR spectrum of **2** (200 MHz, CDCl<sub>3</sub>).

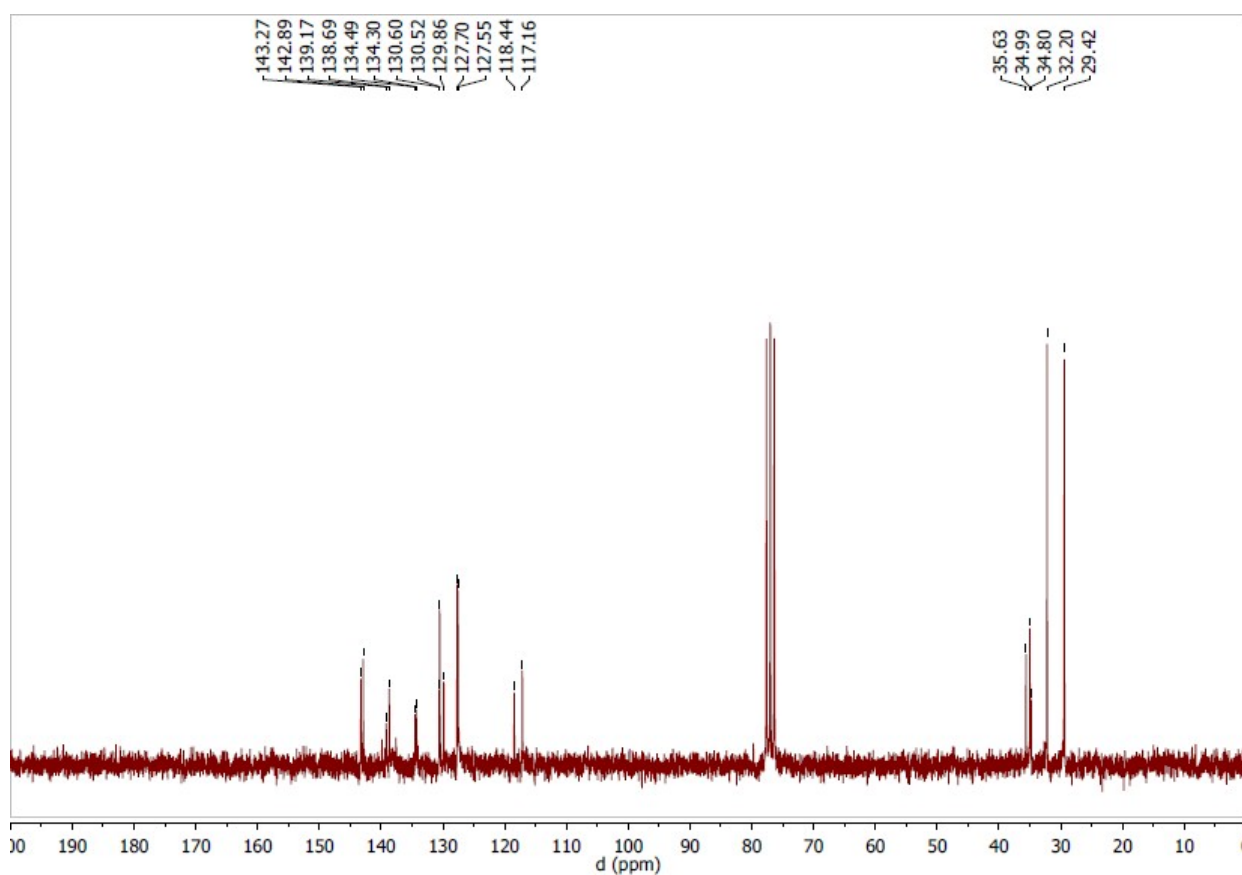

Figure S4. The <sup>13</sup>C{<sup>1</sup>H} NMR spectrum of **2** (50 MHz, CDCl<sub>3</sub>).

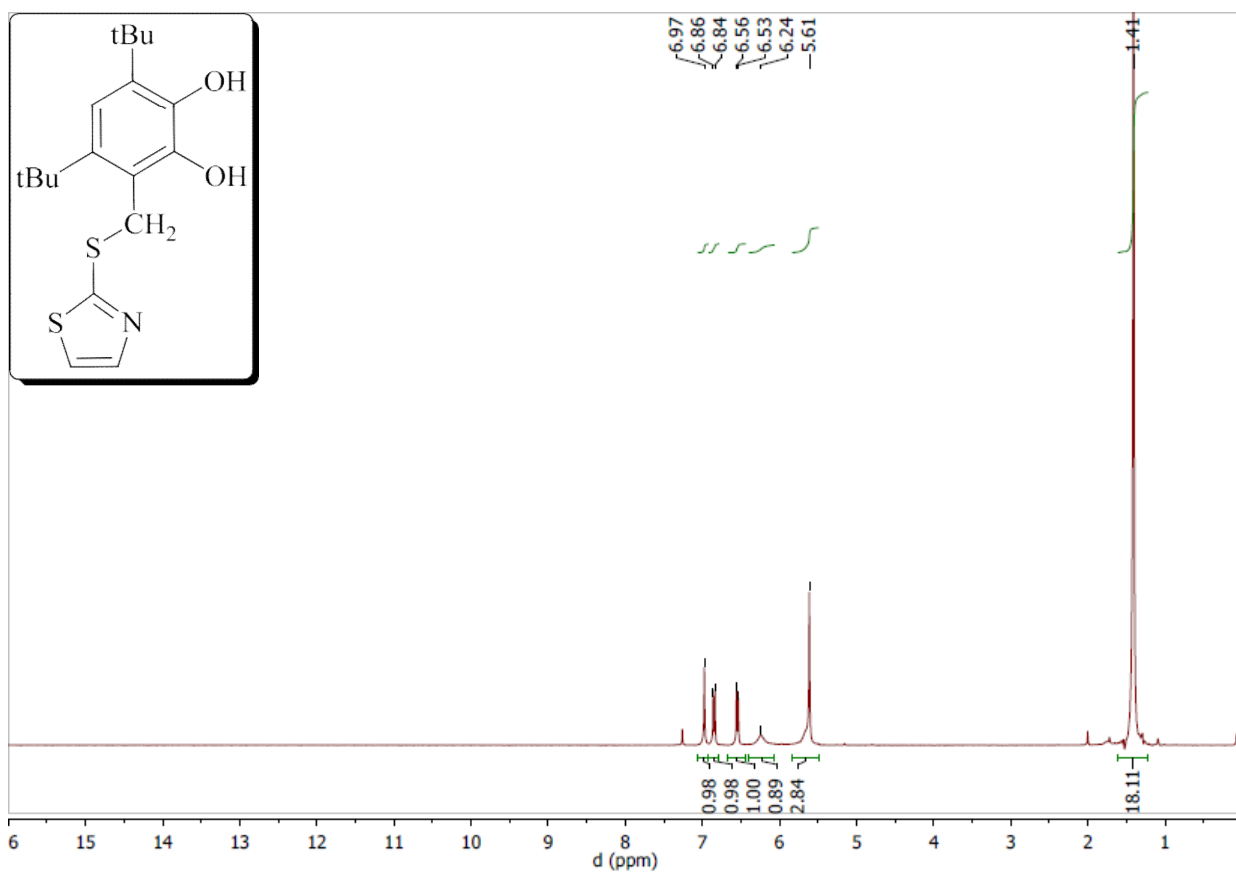

Figure S5. The <sup>1</sup>H NMR spectrum of **4** (200 MHz, CDCl<sub>3</sub>).

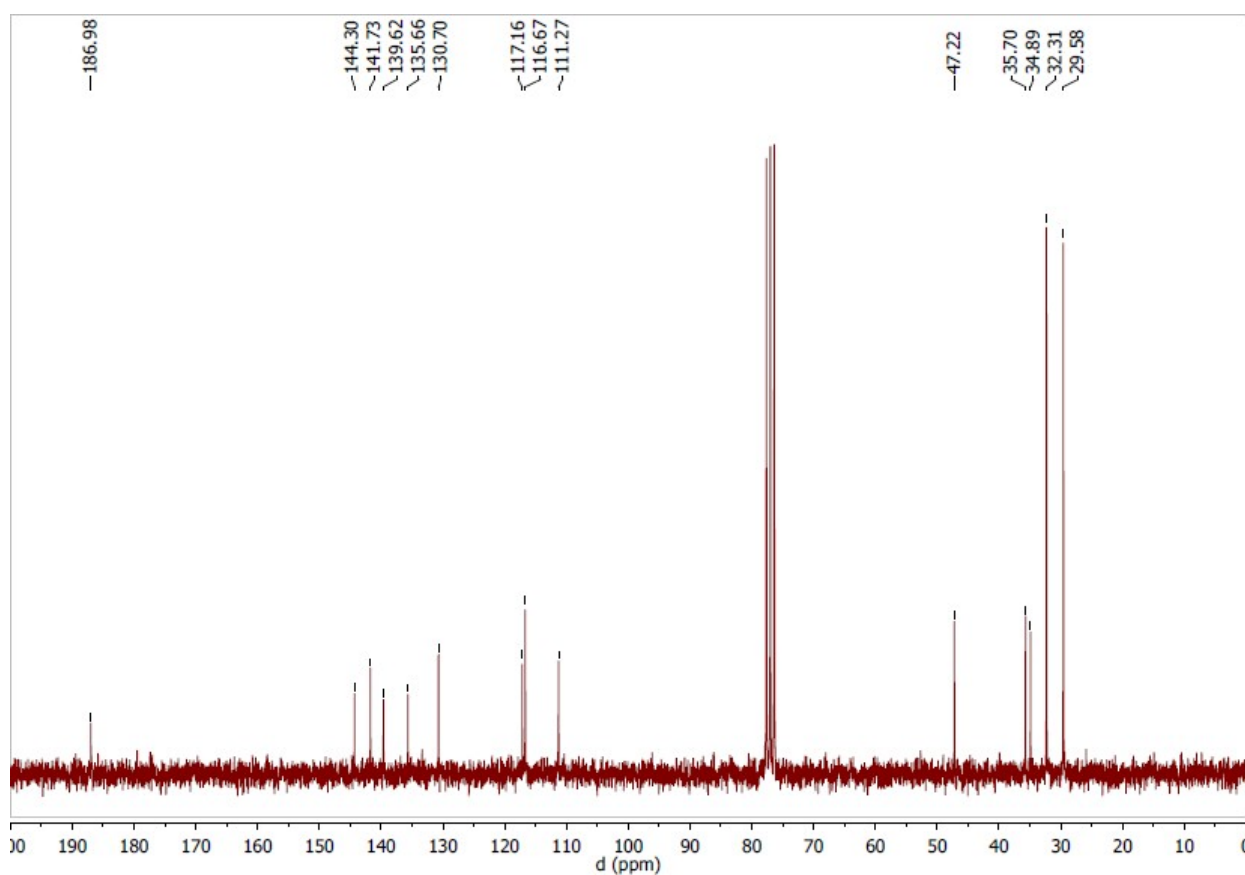

Figure S6. The <sup>13</sup>C{<sup>1</sup>H} NMR spectrum of **4** (50 MHz, CDCl<sub>3</sub>).

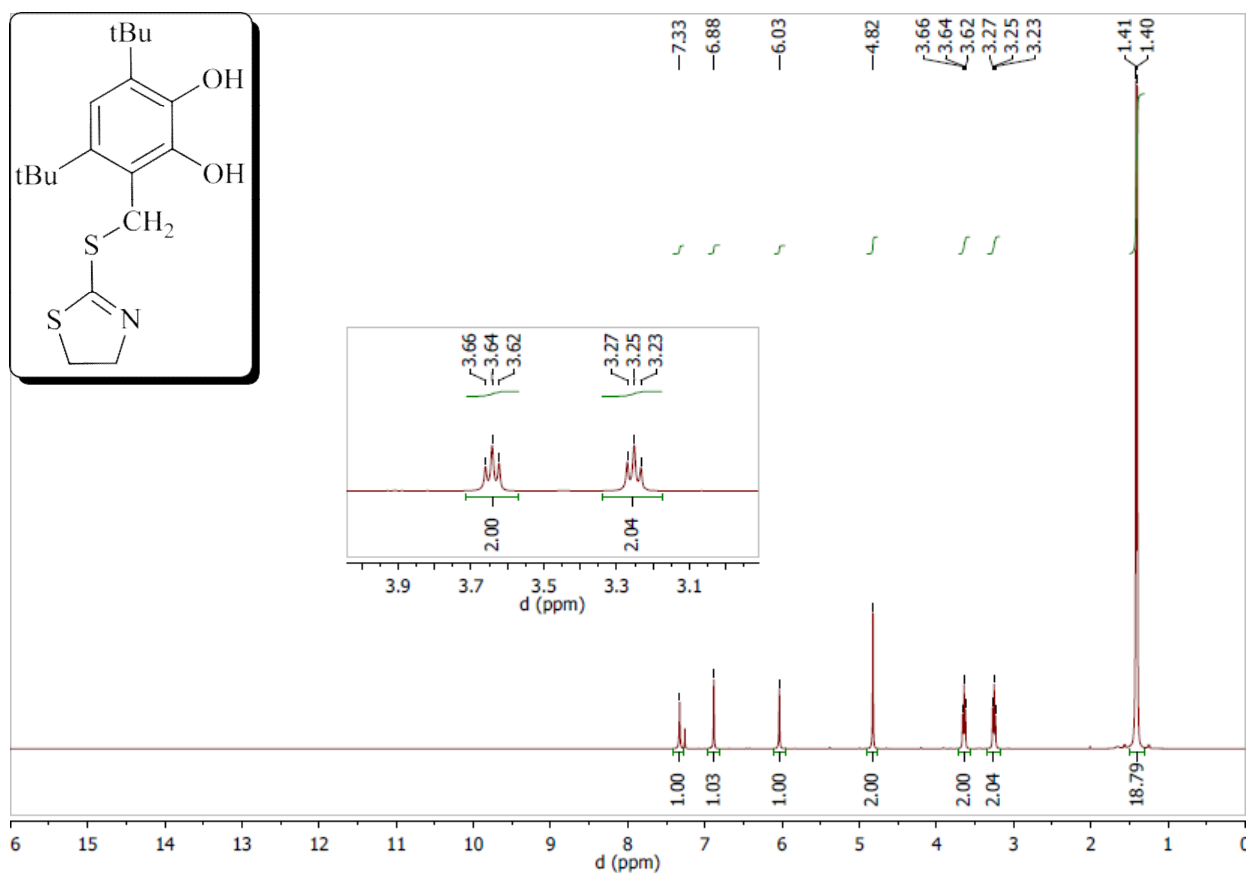

Figure S7. The <sup>1</sup>H NMR spectrum of **5** (400 MHz, CDCl<sub>3</sub>).

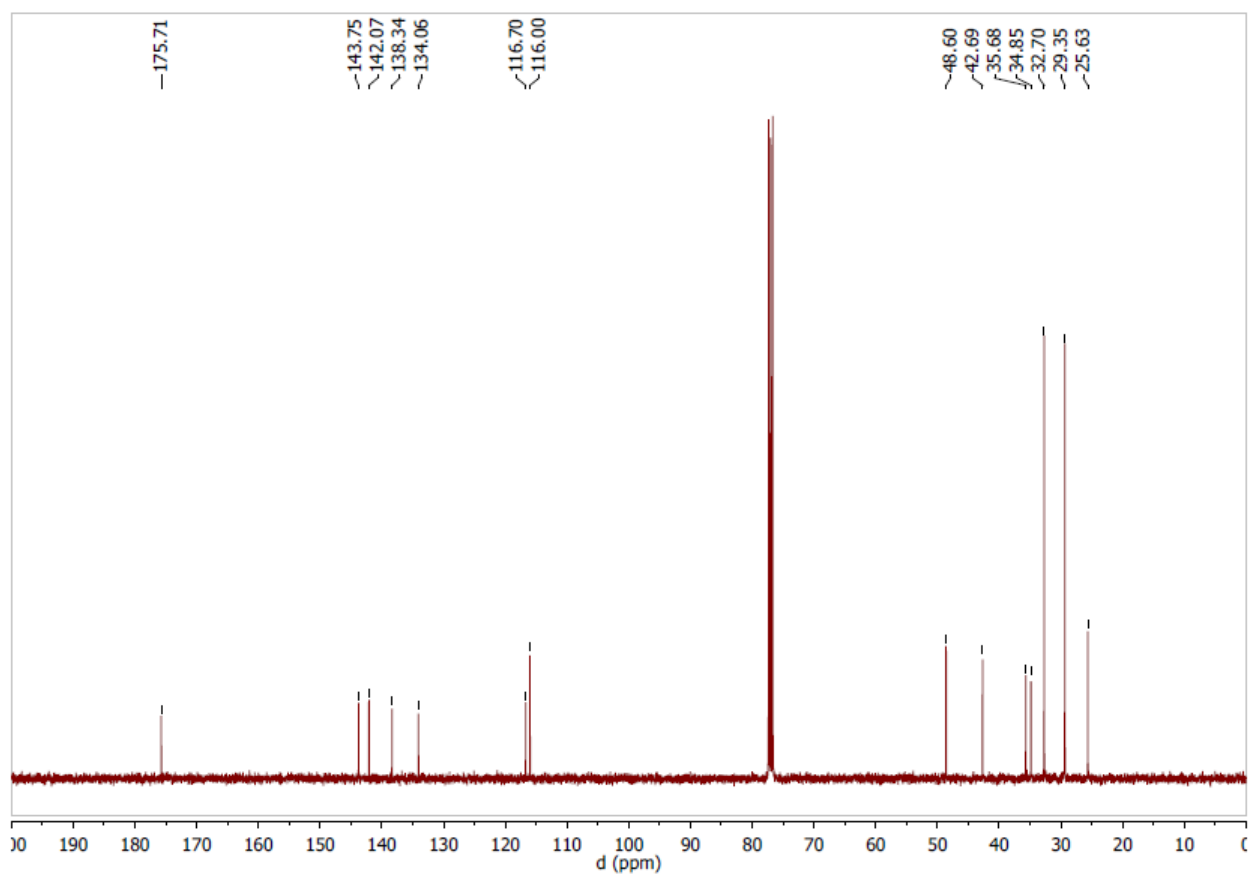

Figure S8. The <sup>13</sup>C{<sup>1</sup>H} NMR spectrum of **5** (100 MHz, CDCl<sub>3</sub>).

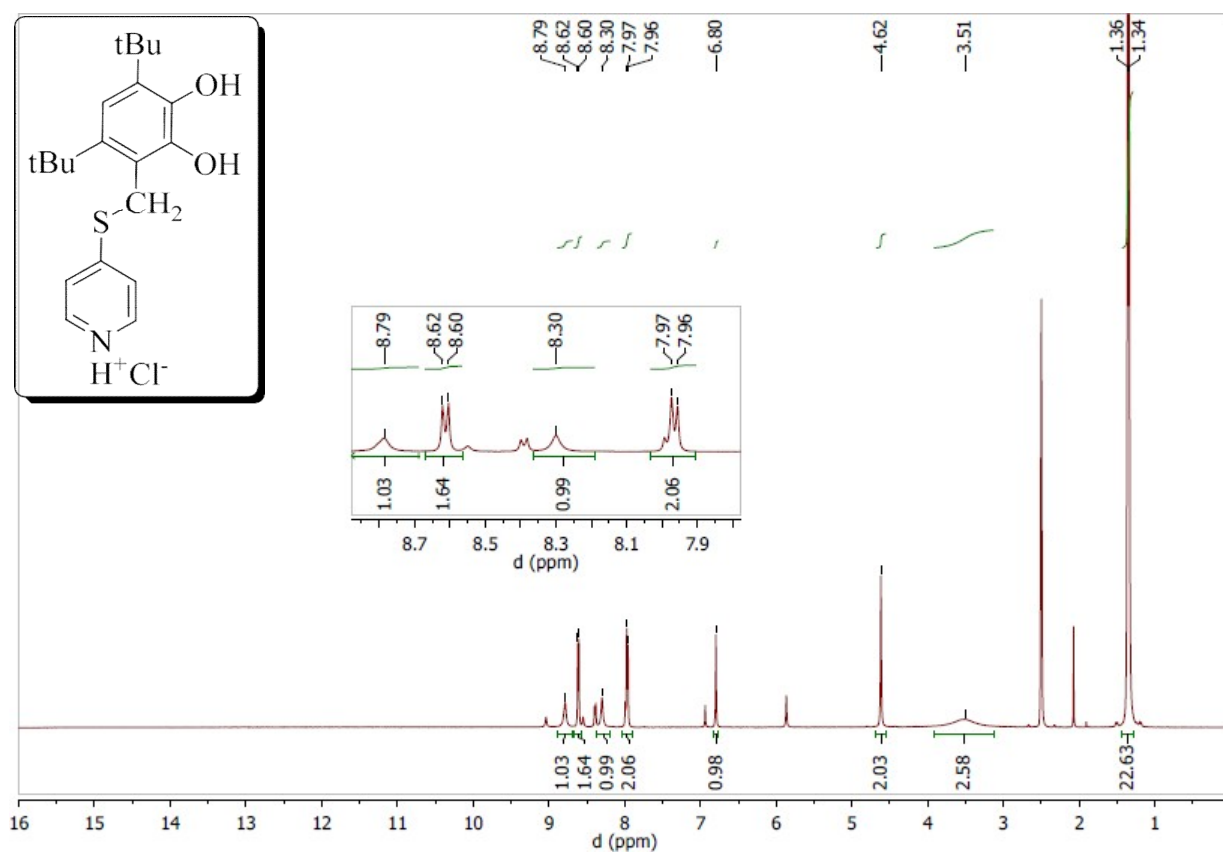

Figure S9. The <sup>1</sup>H NMR spectrum of **6** (200 MHz, DMSO-d<sub>6</sub>).

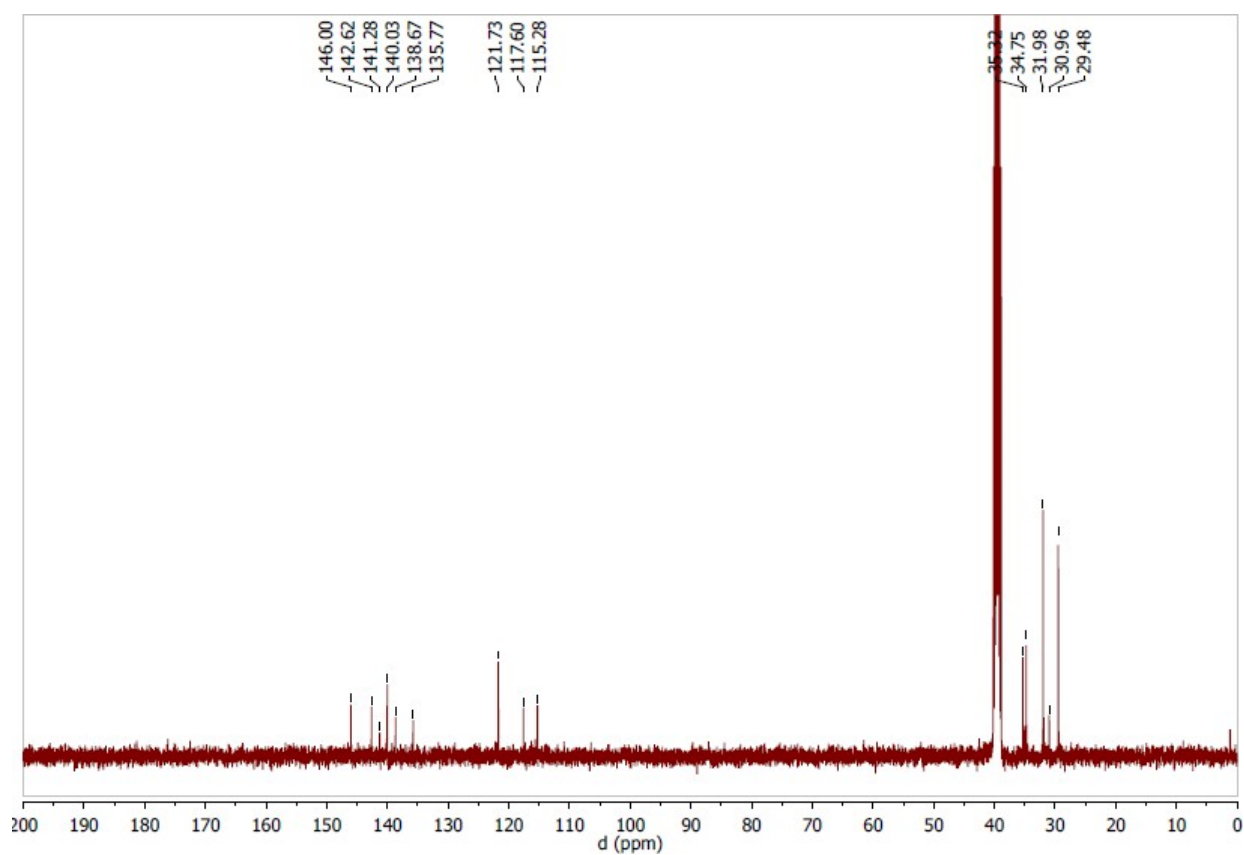

Figure S10. The <sup>13</sup>C{<sup>1</sup>H} NMR spectrum of **6** (50 MHz, DMSO-d<sub>6</sub>).

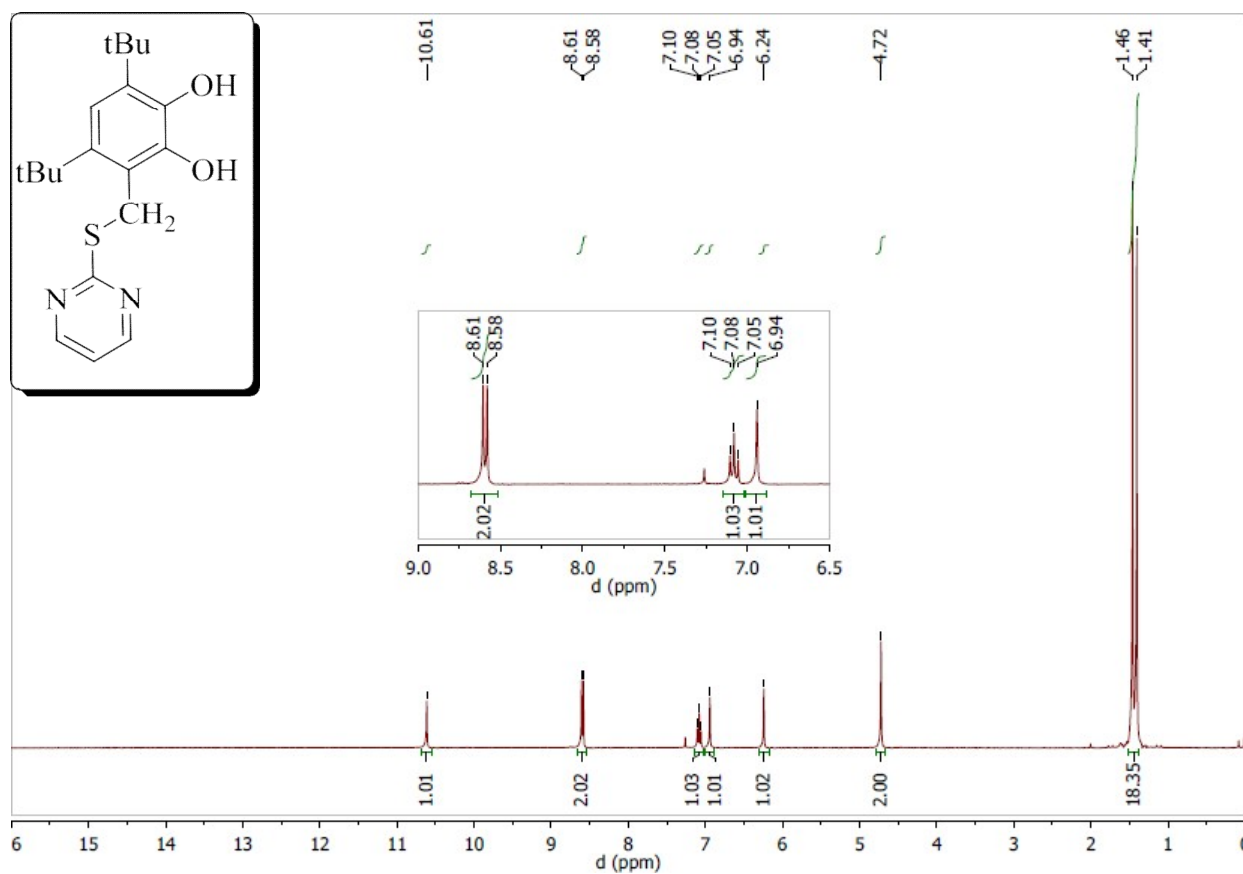

Figure S11. The <sup>1</sup>H NMR spectrum of **7** (200 MHz, CDCl<sub>3</sub>).

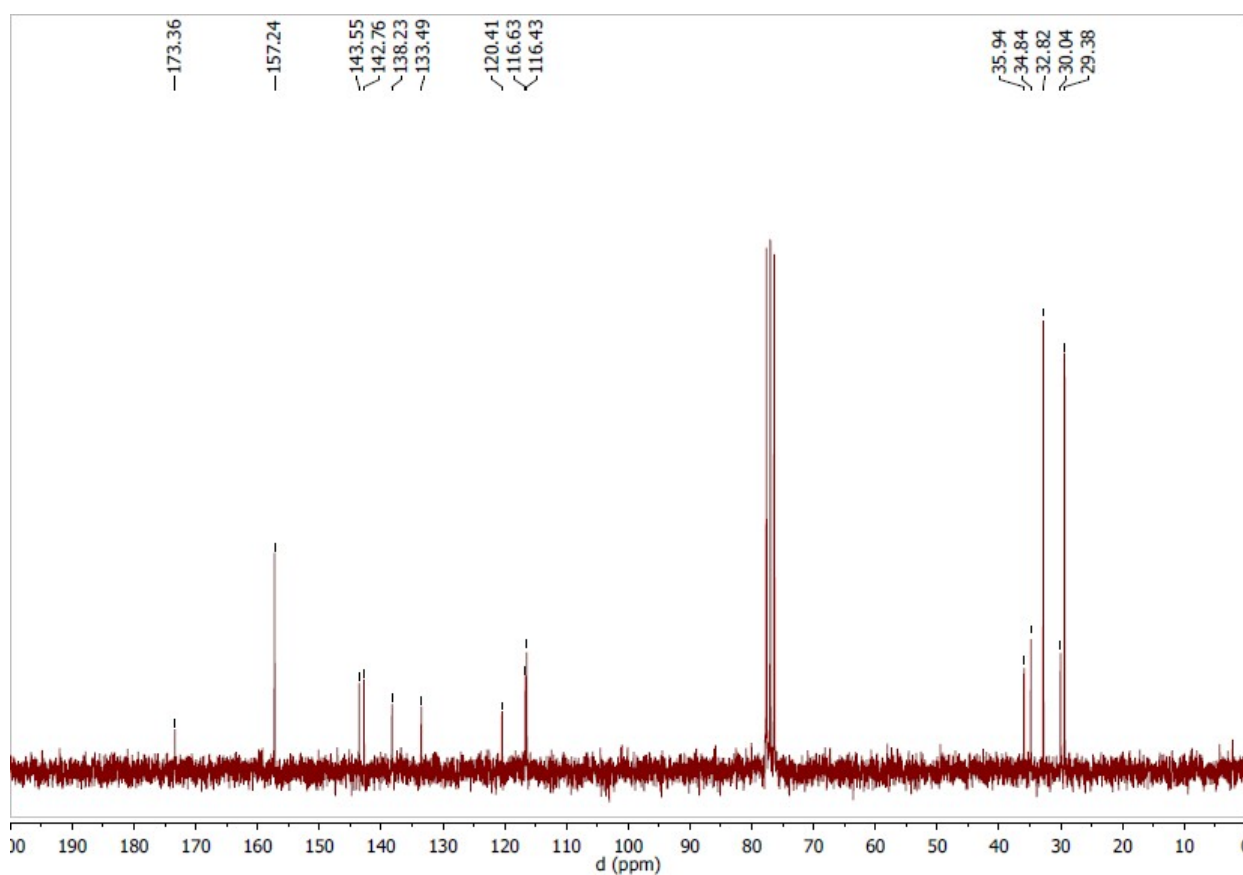

Figure S12. The <sup>13</sup>C{<sup>1</sup>H} NMR spectrum of **7** (50 MHz, CDCl<sub>3</sub>).

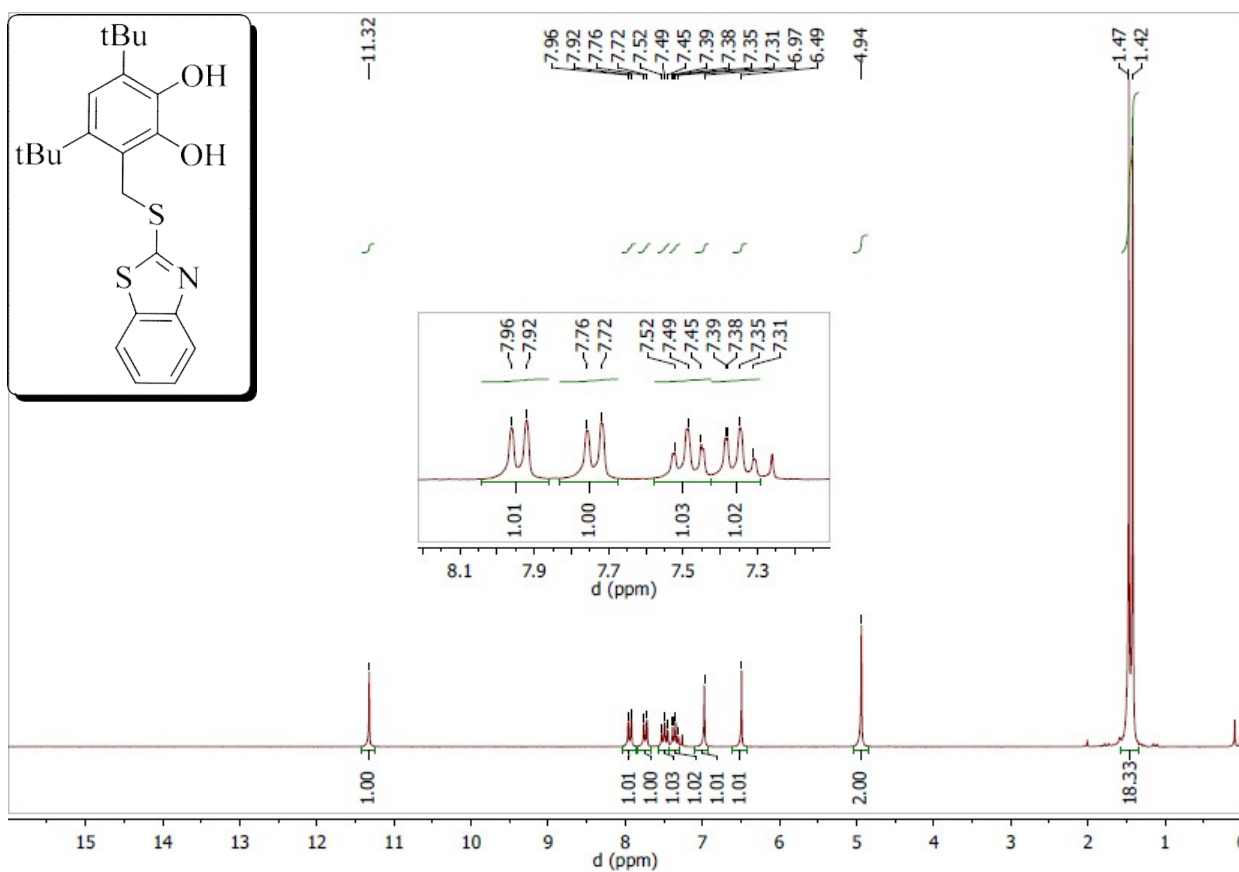

Figure S13. The  $^1\text{H}$  NMR spectrum of **8** (200 MHz,  $\text{CDCl}_3$ ).

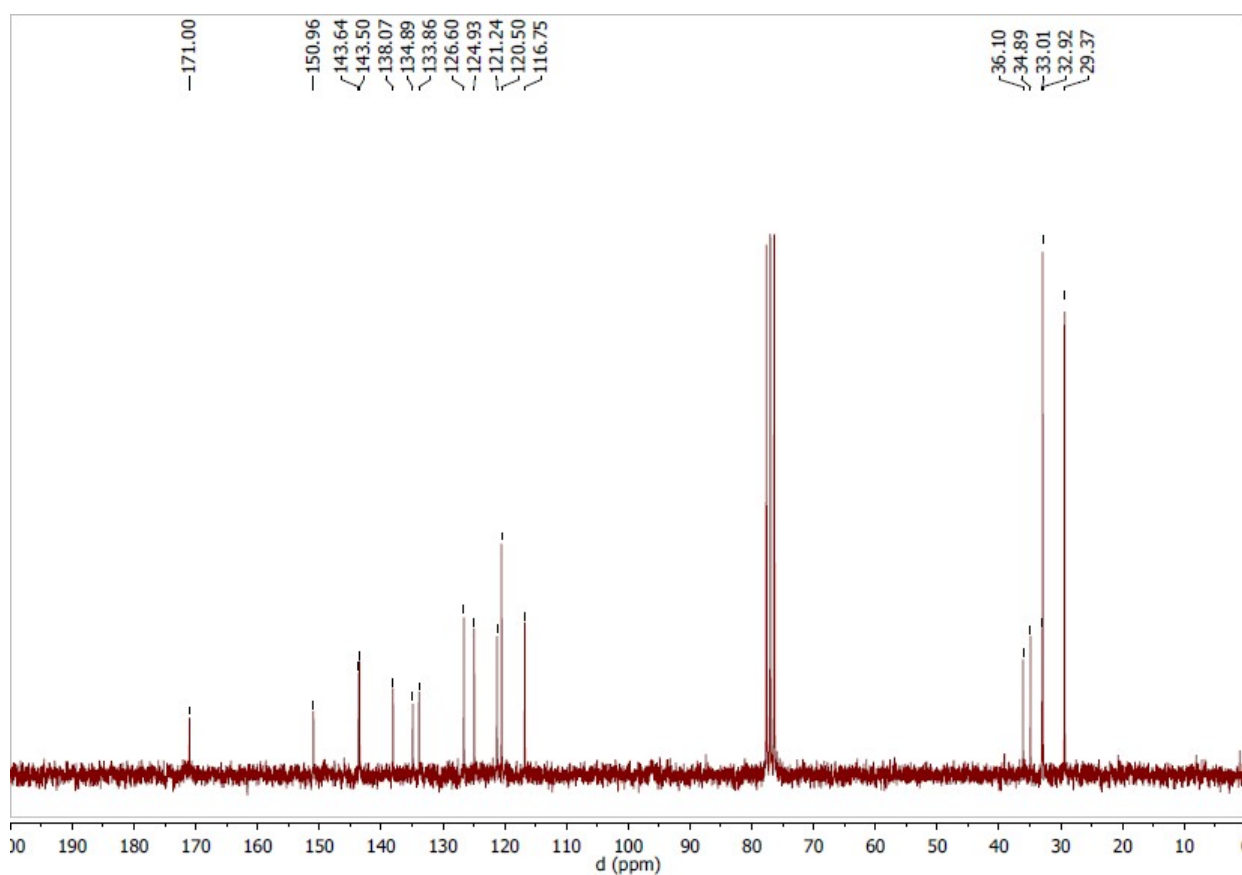

Figure S14. The  $^{13}\text{C}\{^1\text{H}\}$  NMR spectrum of **8** (50 MHz,  $\text{CDCl}_3$ ).

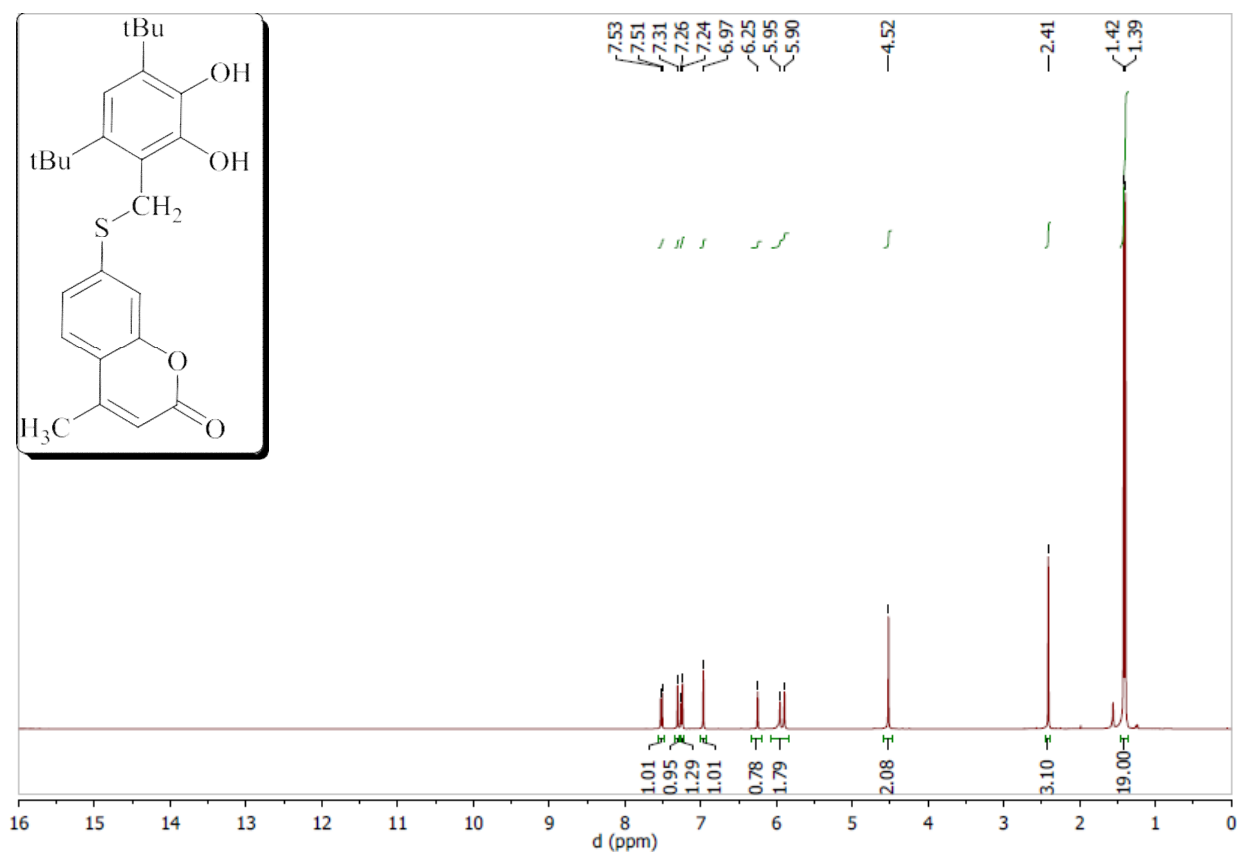

Figure S15. The <sup>1</sup>H NMR spectrum of **9** (400 MHz, CDCl<sub>3</sub>).

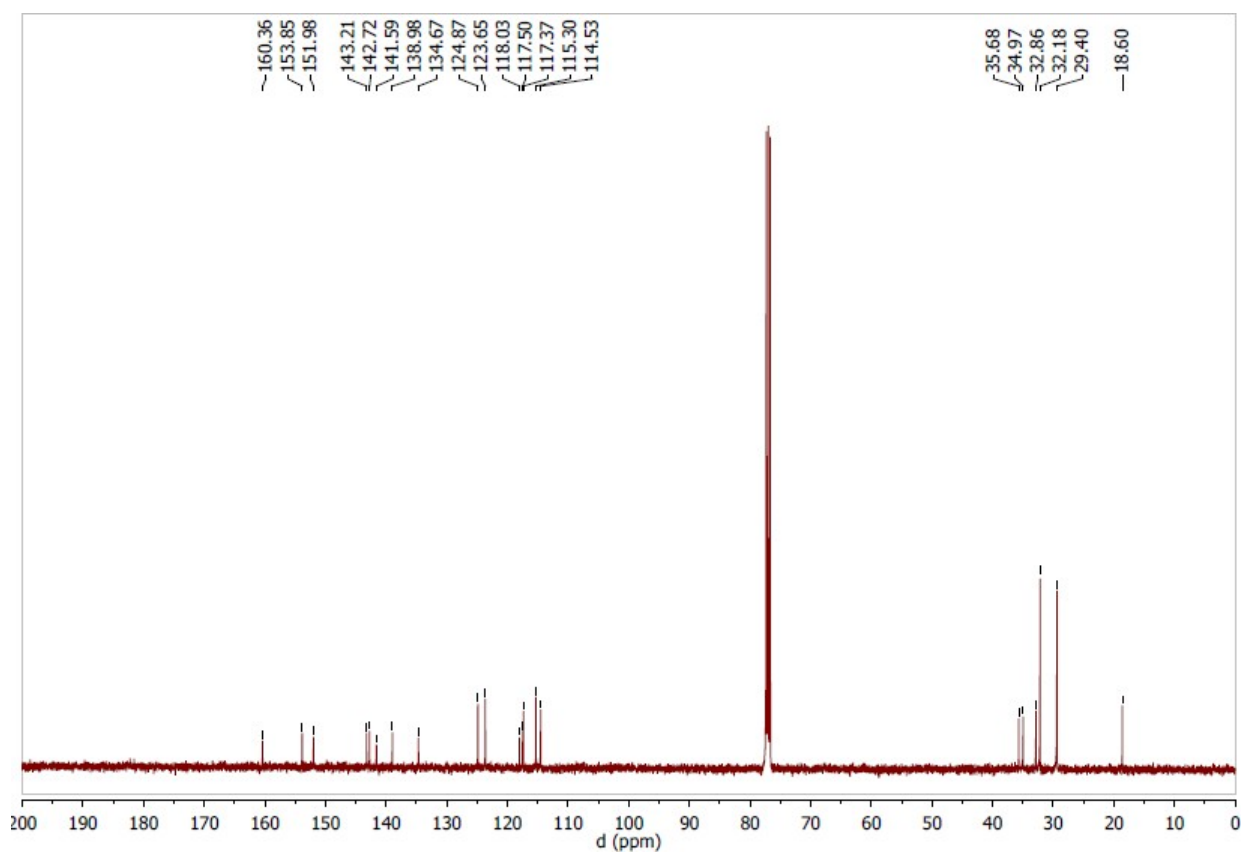

Figure S16. The <sup>13</sup>C{<sup>1</sup>H} NMR spectrum of **9** (100 MHz, CDCl<sub>3</sub>).

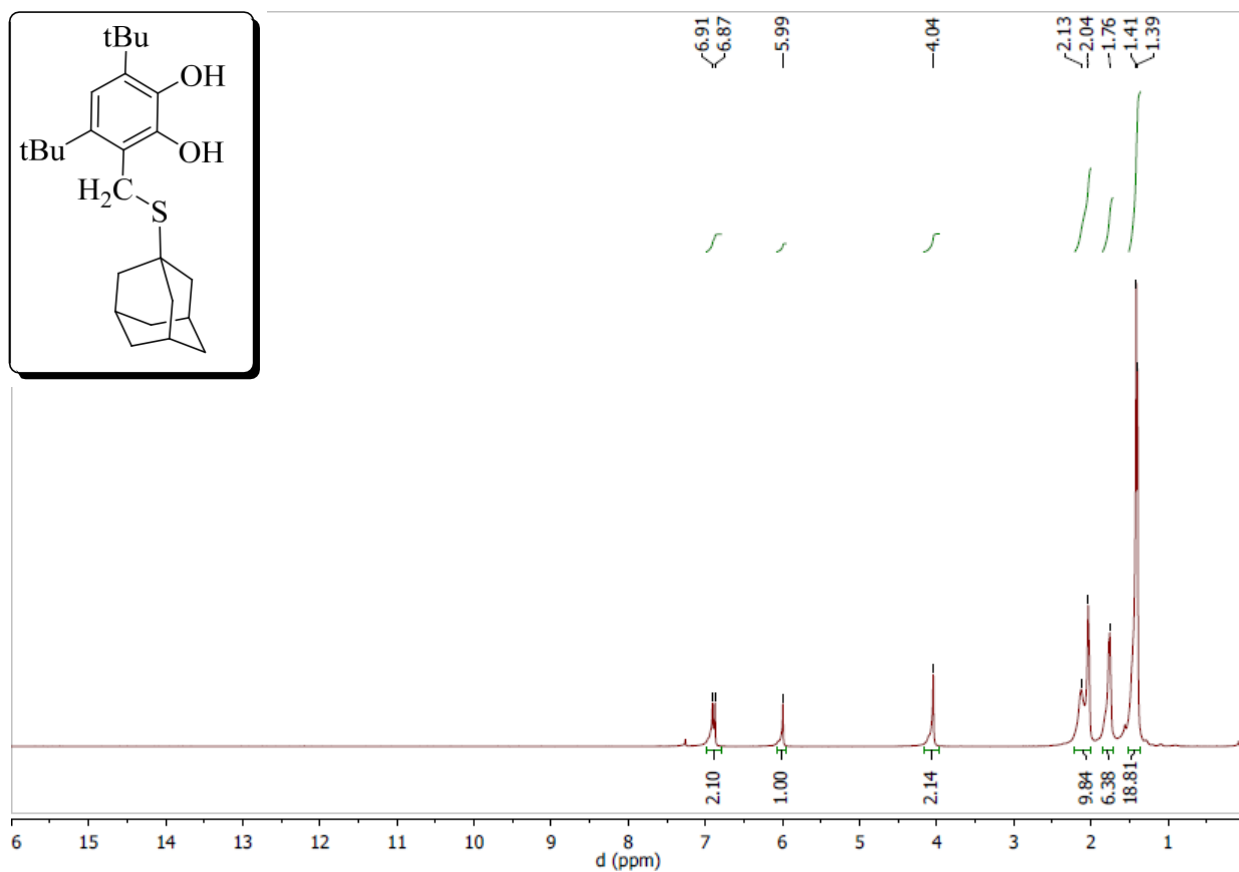

Figure S17. The <sup>1</sup>H NMR spectrum of **10** (200 MHz, CDCl<sub>3</sub>).

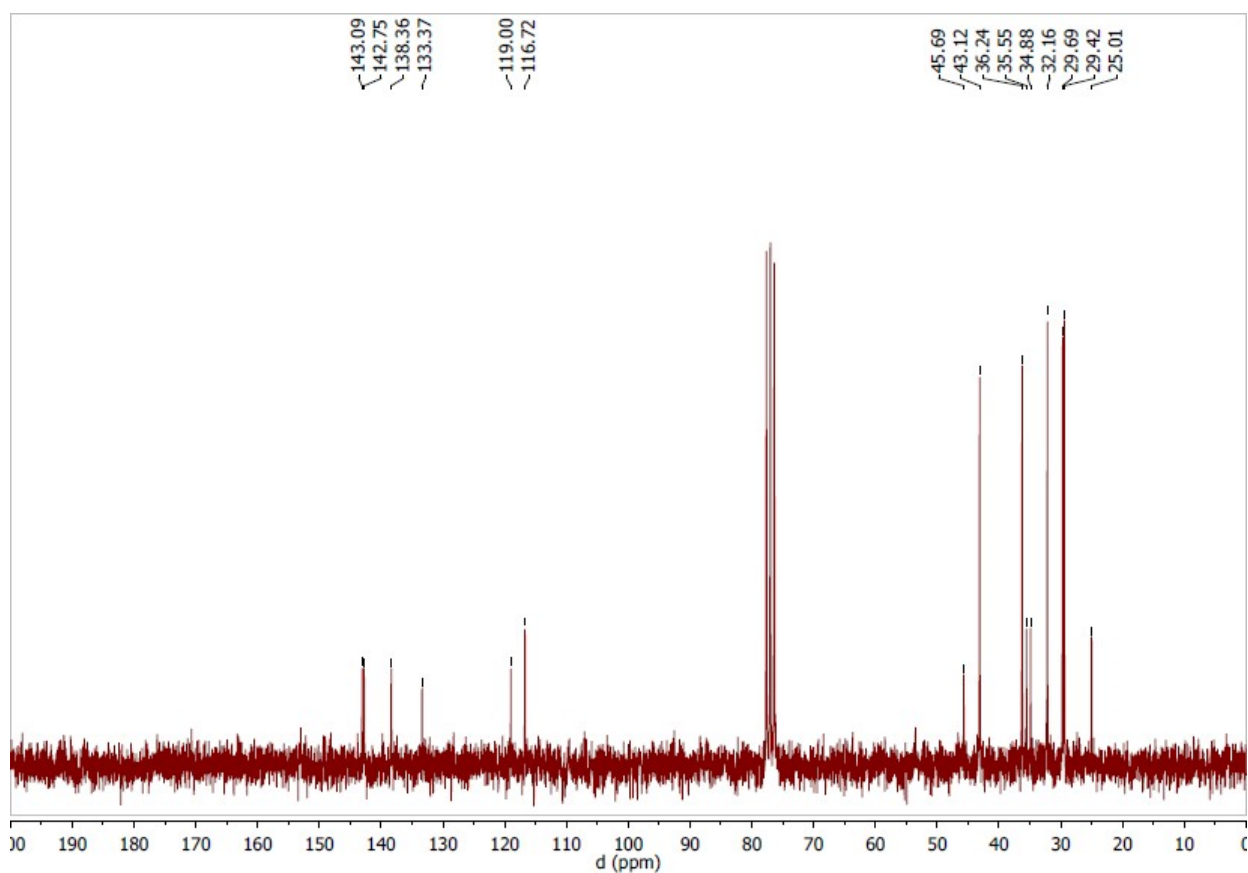

Figure S18. The <sup>13</sup>C{<sup>1</sup>H} NMR spectrum of **10** (50 MHz, CDCl<sub>3</sub>).

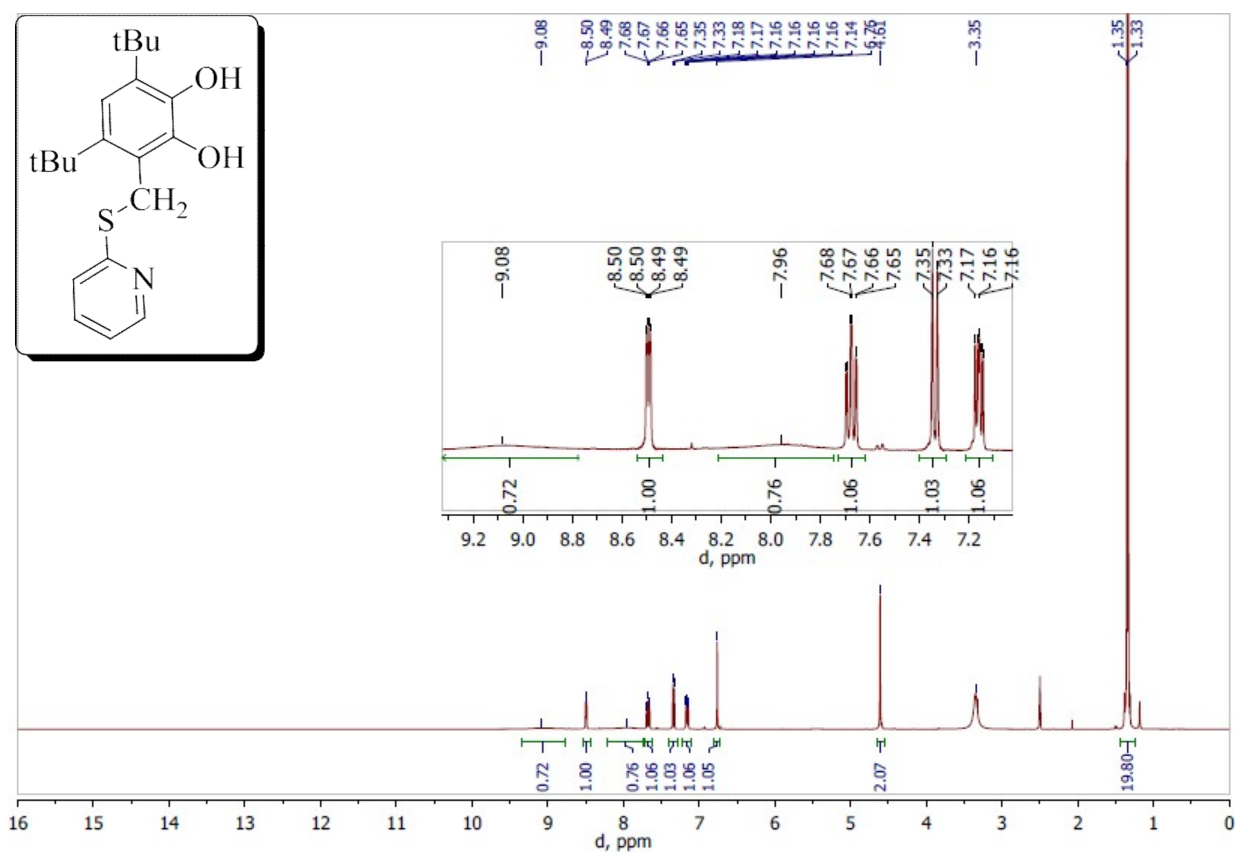

Figure S19. The <sup>1</sup>H NMR spectrum of **11** (400 MHz, DMSO-d<sub>6</sub>).

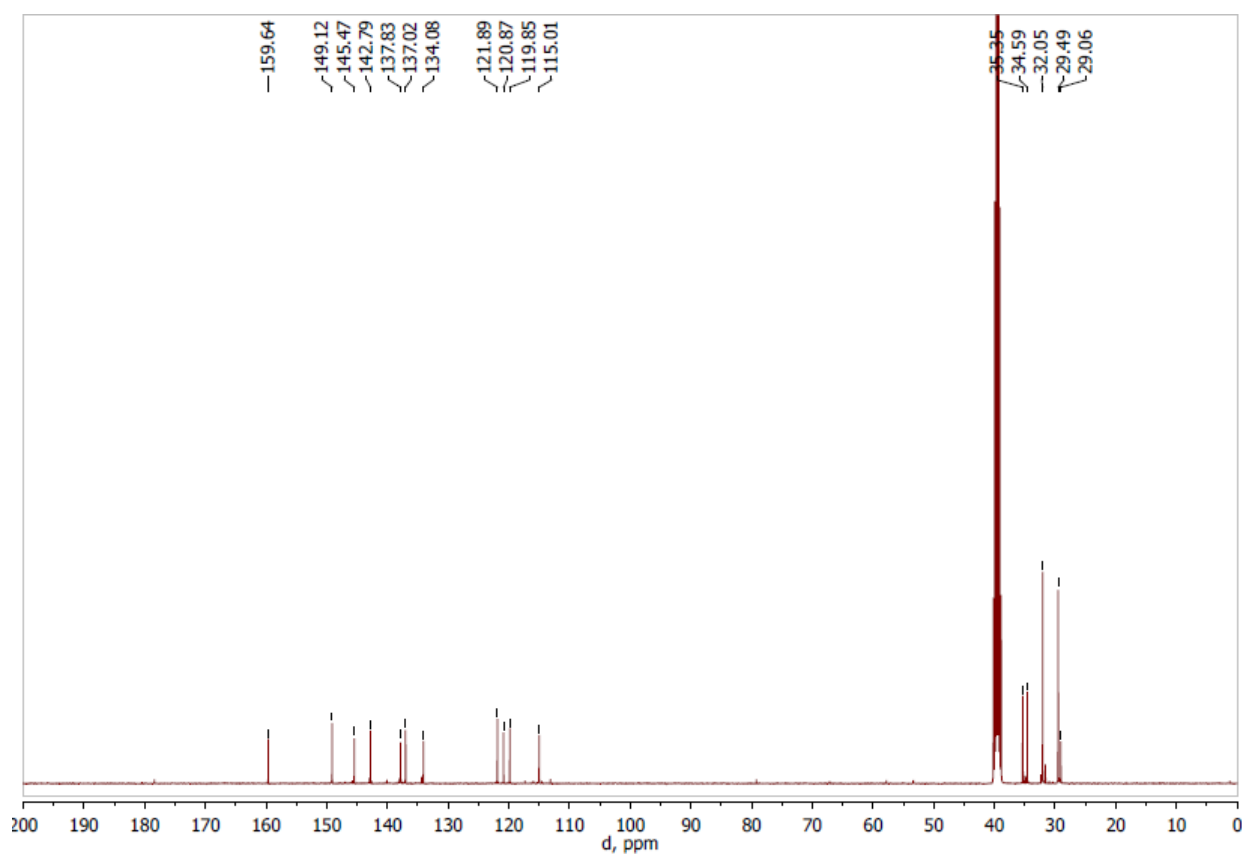

Figure S20. The <sup>13</sup>C{<sup>1</sup>H} NMR spectrum of **11** (100 MHz, DMSO-d<sub>6</sub>).

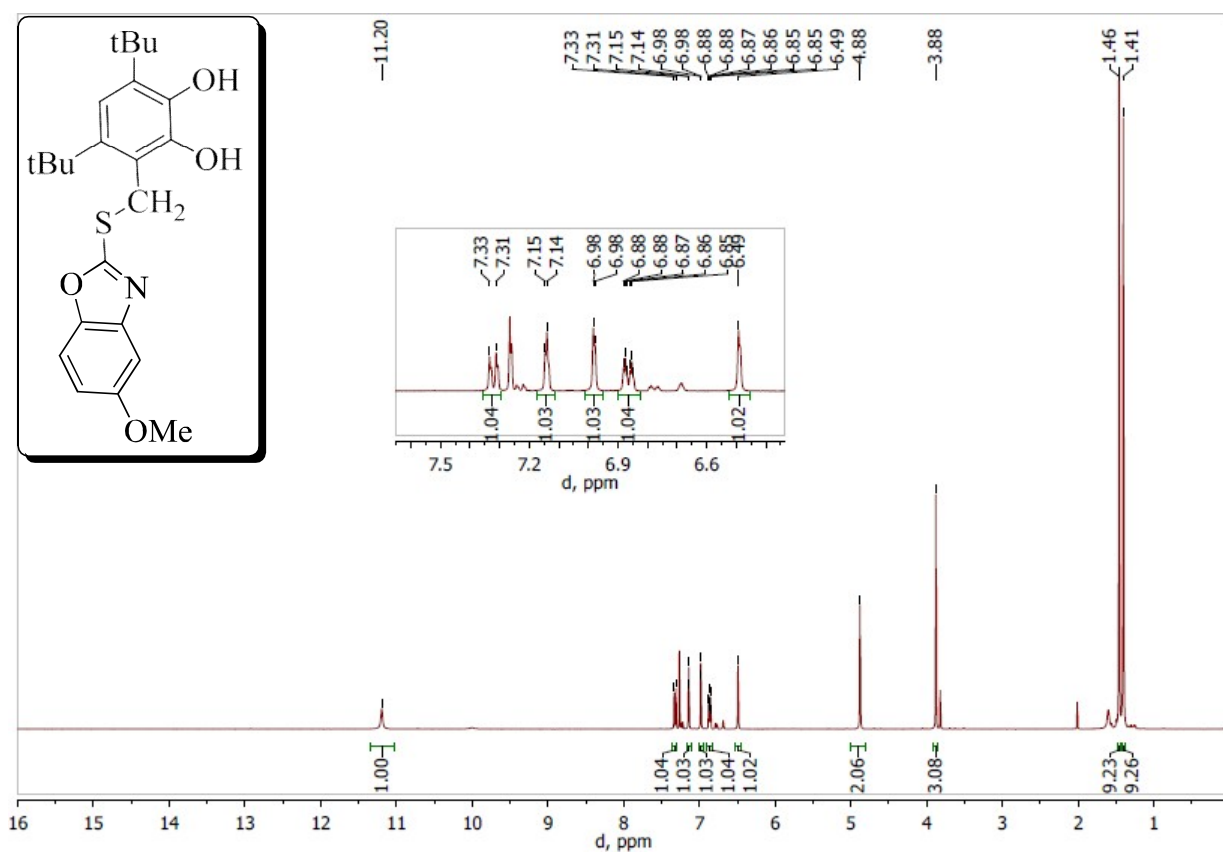

Figure S21. The <sup>1</sup>H NMR spectrum of **12** (400 MHz, CDCl<sub>3</sub>).

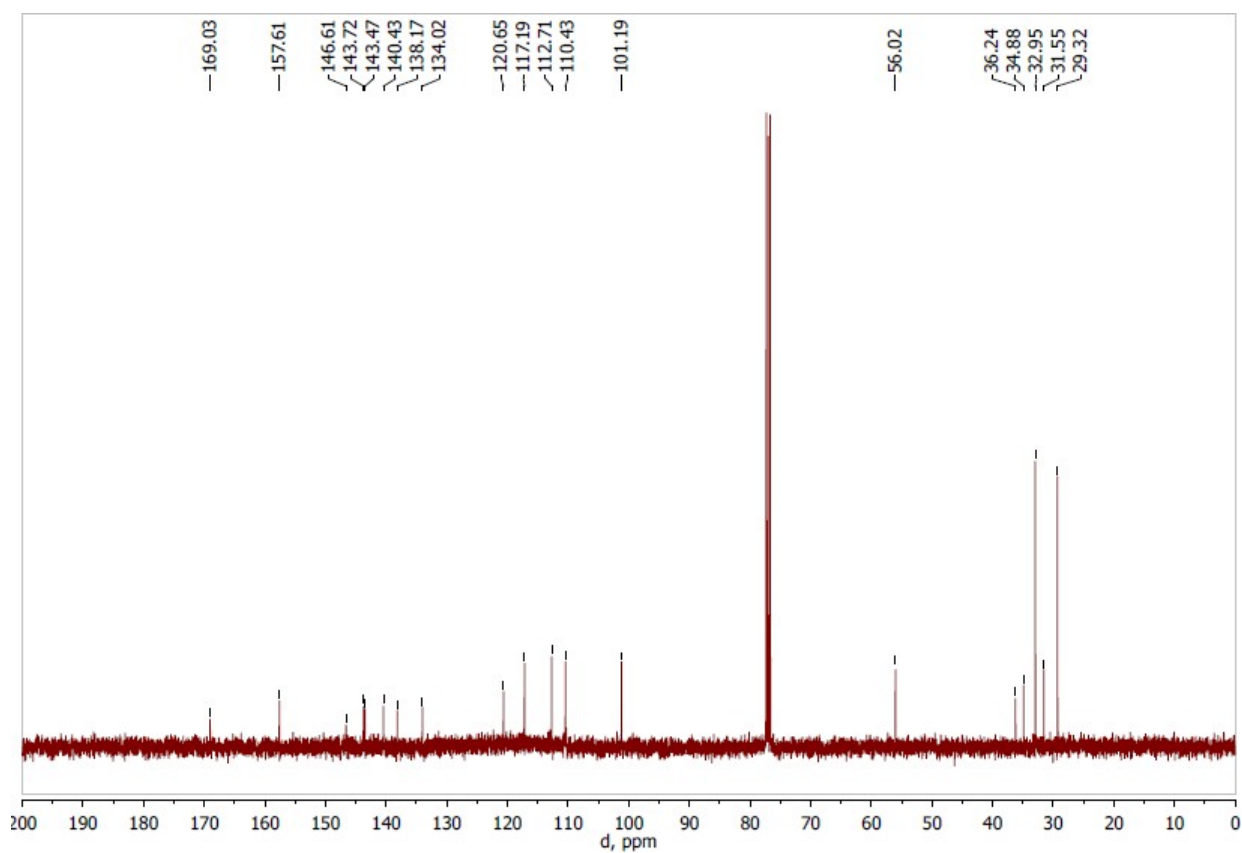

Figure S22. The <sup>13</sup>C{<sup>1</sup>H} NMR spectrum of **12** (100 MHz, CDCl<sub>3</sub>).

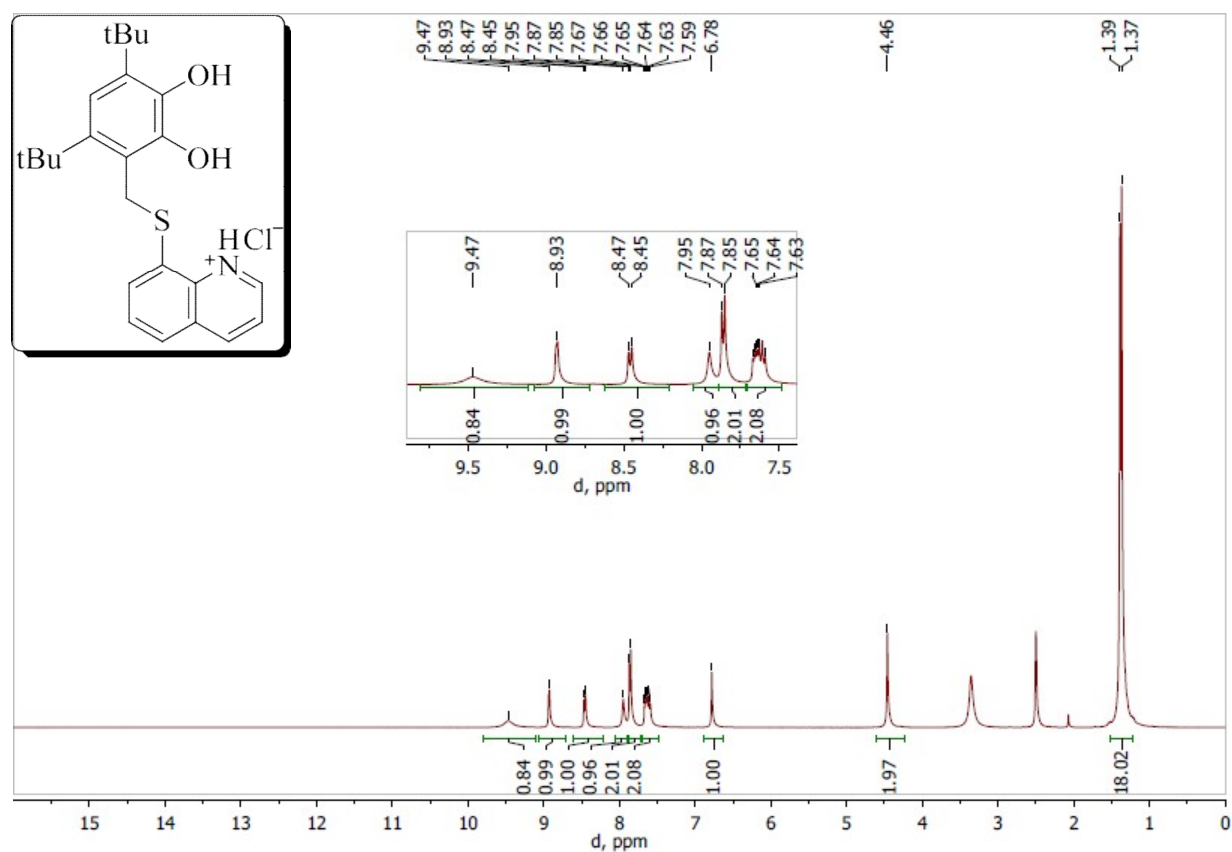

Figure S23. The <sup>1</sup>H NMR spectrum of **13** (400 MHz, DMSO-d<sub>6</sub>).

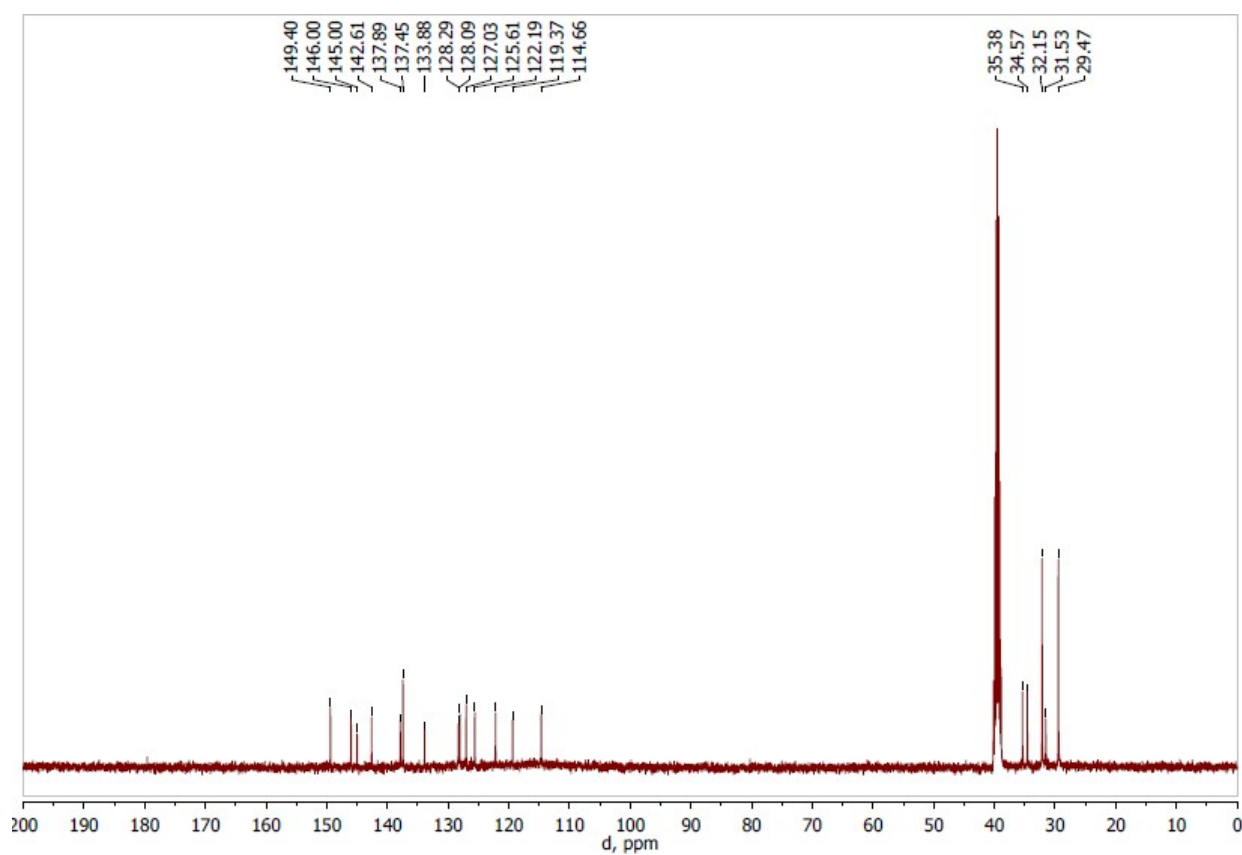

Figure S24. The <sup>13</sup>C{<sup>1</sup>H} NMR spectrum of **13** (100 MHz, DMSO-d<sub>6</sub>).

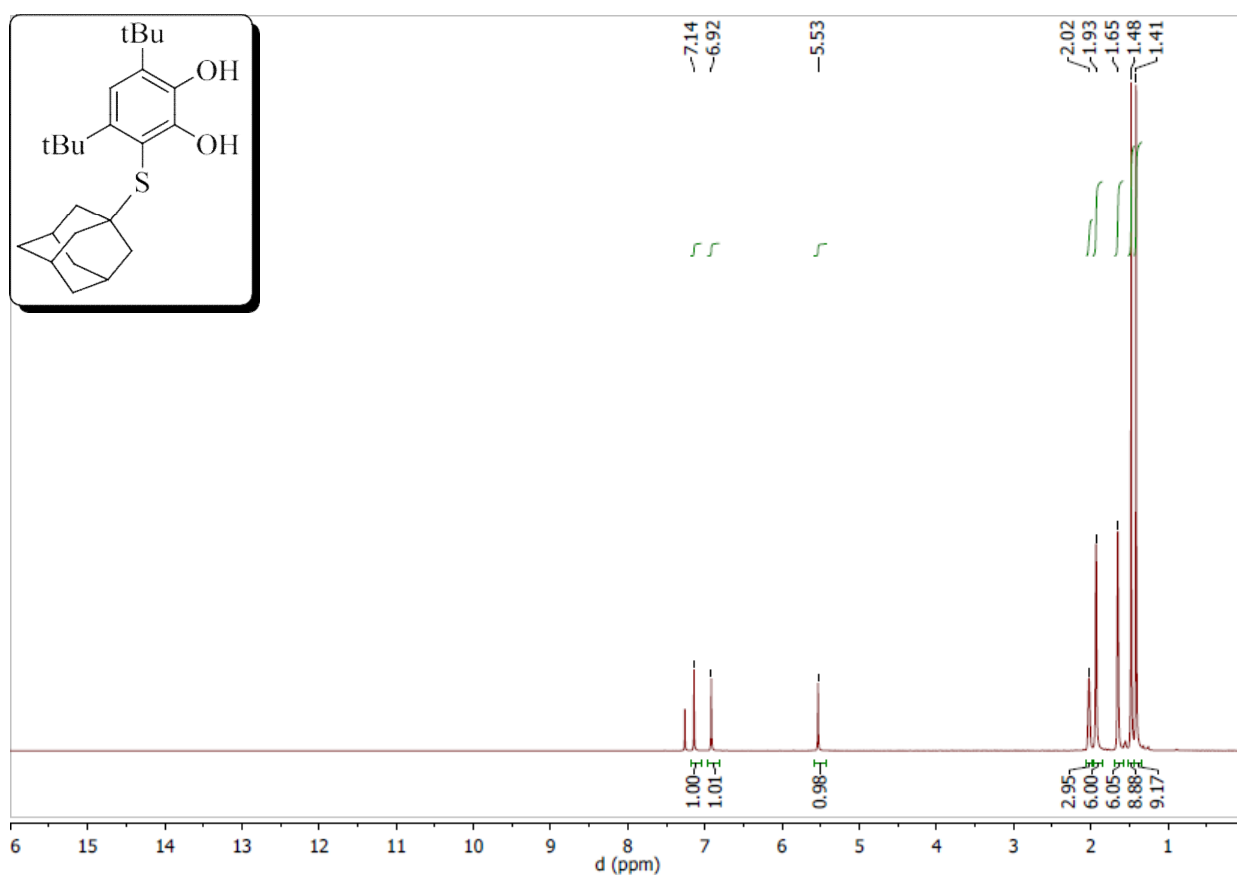

Figure S25. The  $^1\text{H}$  NMR spectrum of **14** (400 MHz,  $\text{CDCl}_3$ ).

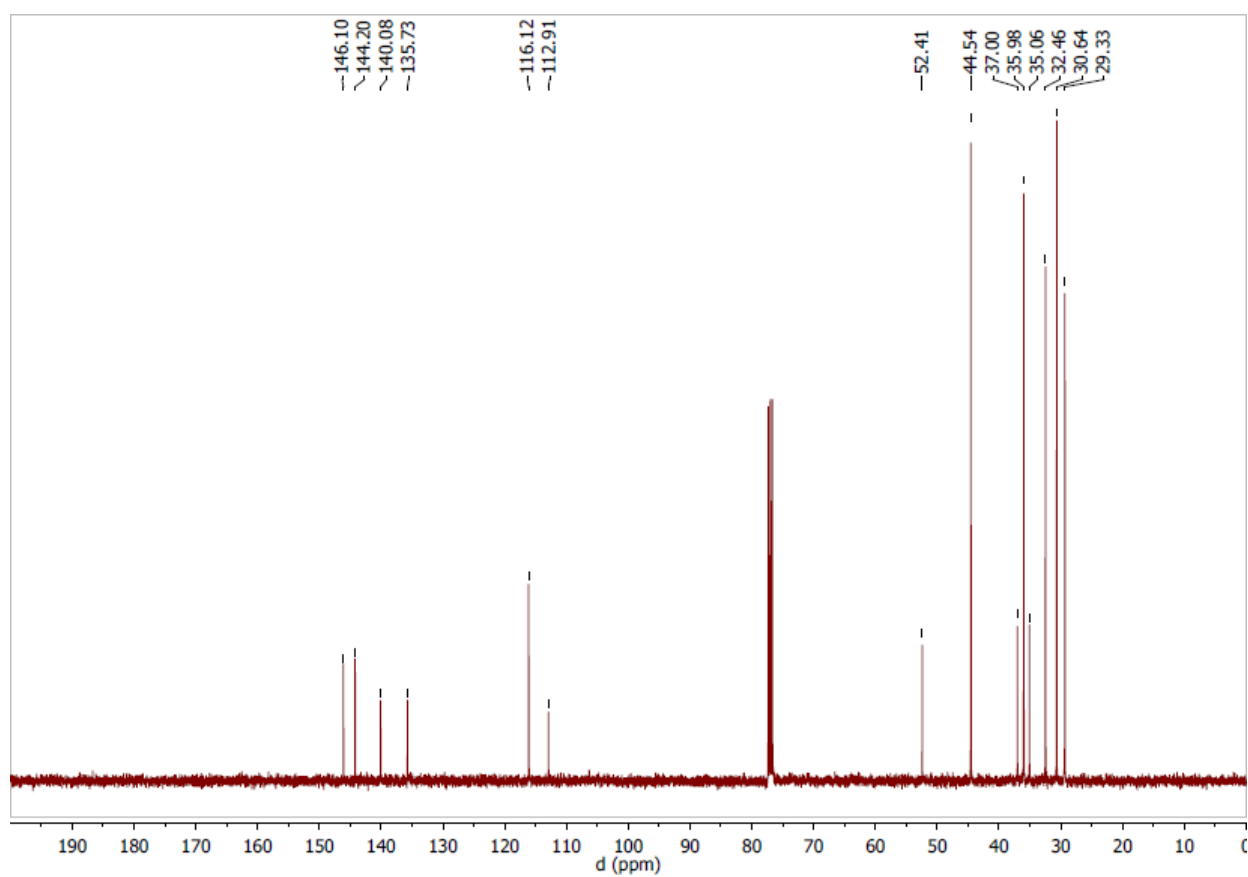

Figure S26. The  $^{13}\text{C}\{^1\text{H}\}$  NMR spectrum of **14** (100 MHz,  $\text{CDCl}_3$ ).

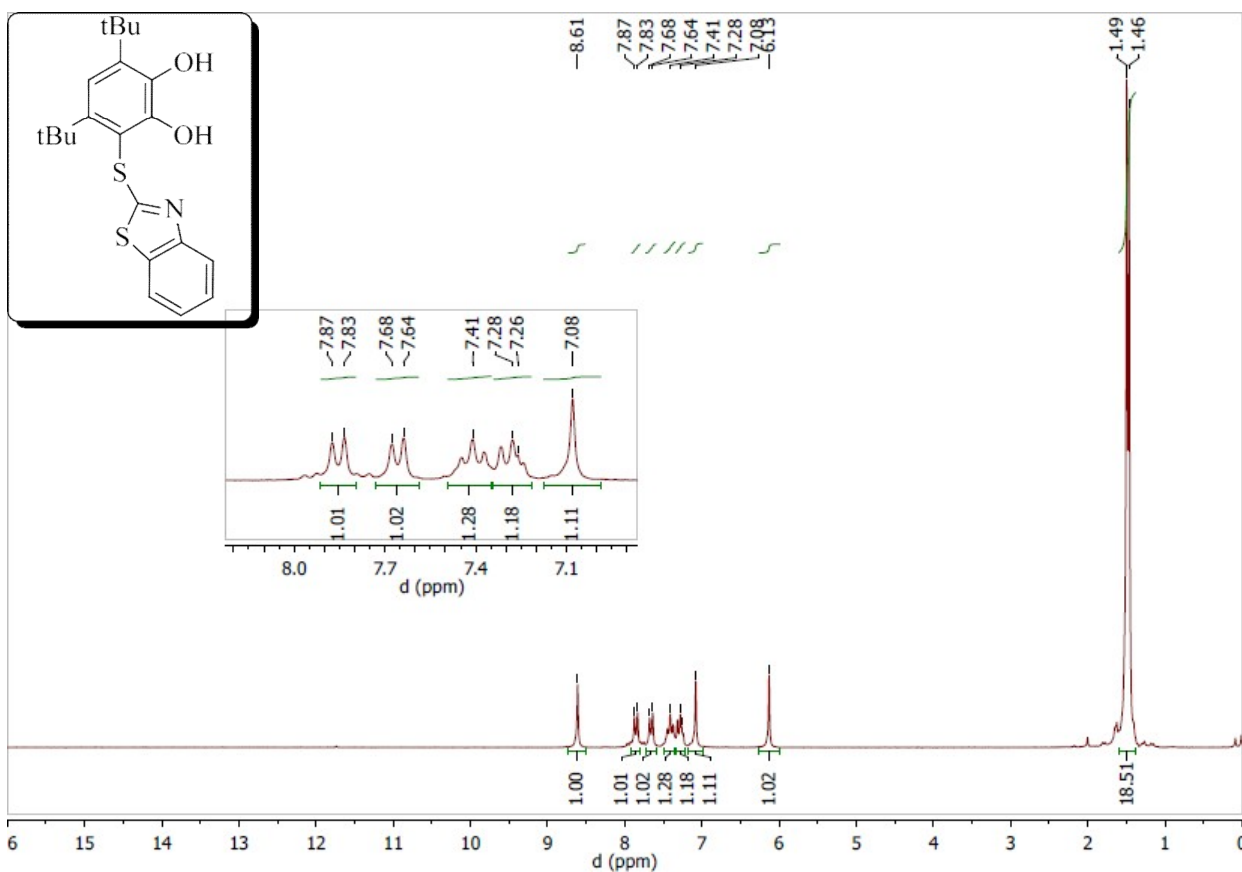

Figure S27. The <sup>1</sup>H NMR spectrum of **15** (400 MHz, CDCl<sub>3</sub>).

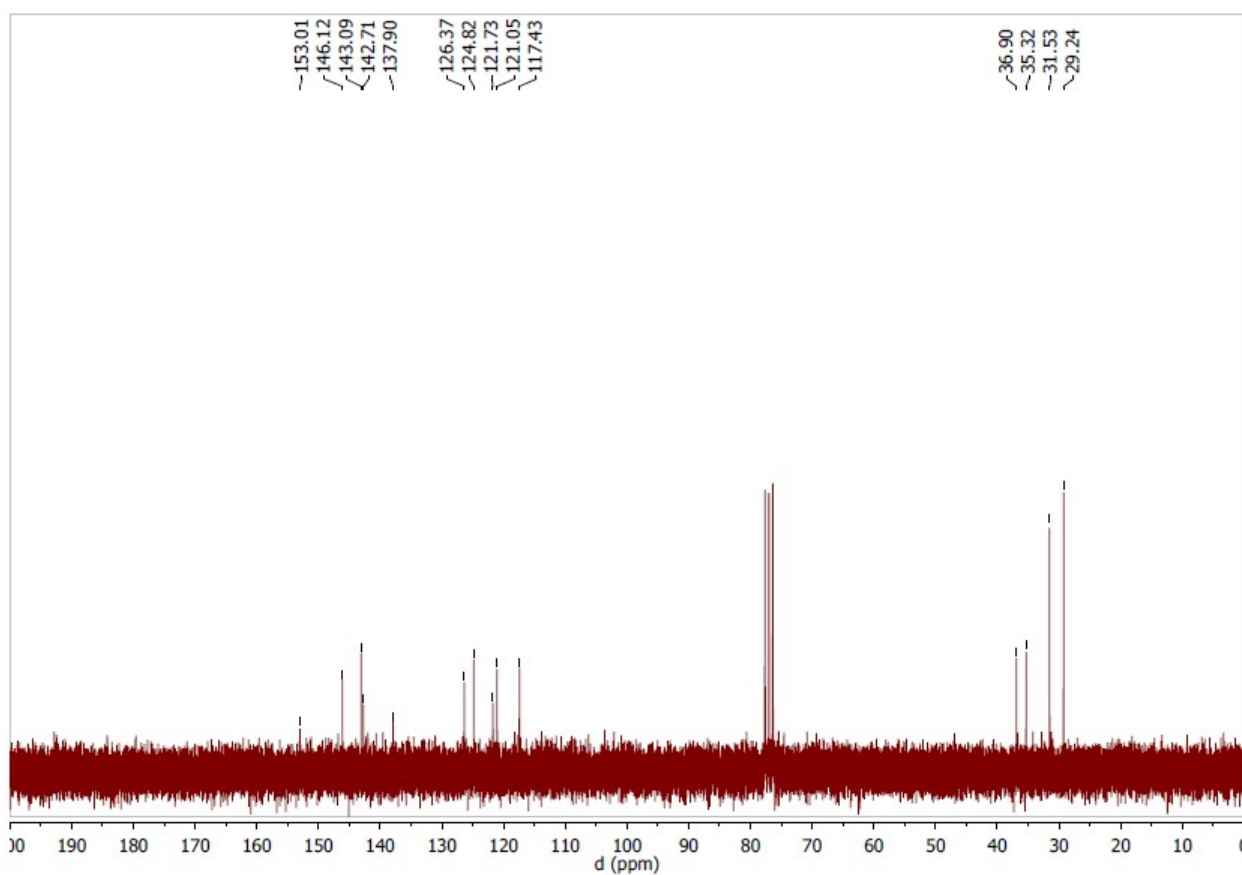

Figure S28. The <sup>13</sup>C{<sup>1</sup>H} NMR spectrum of **15** (100 MHz, CDCl<sub>3</sub>).

**Table S1.** Crystal data and structure refinement for **8** and **15**.

| Compound                                       | <b>8</b>                                                       | <b>15</b>                                                      |
|------------------------------------------------|----------------------------------------------------------------|----------------------------------------------------------------|
| Empirical formula                              | C <sub>22</sub> H <sub>27</sub> NO <sub>2</sub> S <sub>2</sub> | C <sub>21</sub> H <sub>25</sub> NO <sub>2</sub> S <sub>2</sub> |
| Formula weight                                 | 401.56                                                         | 387.54                                                         |
| Temperature, K                                 | 298(2)                                                         | 298(2)                                                         |
| Wavelength, Å                                  | 0.71073                                                        |                                                                |
| Crystal system                                 | Monoclinic                                                     | Triclinic                                                      |
| space group                                    | P2(1)/n                                                        | P-1                                                            |
| Unit cell dimensions                           |                                                                |                                                                |
| a, Å                                           | 9.3517(7)                                                      | 9.5246(9)                                                      |
| b, Å                                           | 15.8237(11)                                                    | 9.9168(11)                                                     |
| c, Å                                           | 15.0865(10)                                                    | 11.0339(9)                                                     |
| alpha, deg.                                    | 90                                                             | 88.784(8)                                                      |
| beta, deg.                                     | 106.800(2)                                                     | 87.994(7)                                                      |
| gamma, deg.                                    | 90                                                             | 82.011(9)                                                      |
| Volume, Å <sup>3</sup>                         | 2137.2(3)                                                      | 1031.30(17)                                                    |
| Z                                              | 4                                                              | 2                                                              |
| Calculated density, Mg/m <sup>3</sup>          | 1.248                                                          | 1.248                                                          |
| Absorption coefficient, mm <sup>-1</sup>       | 0.265                                                          | 0.273                                                          |
| F(000)                                         | 856                                                            | 412                                                            |
| Crystal size, mm                               | 0.33 x 0.17 x 0.12                                             | 0.36 x 0.24 x 0.15                                             |
| Theta range for data collection, deg.          | 2.304 - 26.022                                                 | 2.888 - 26.021                                                 |
| Limiting indices                               | -11 ≤ h ≤ 11<br>-19 ≤ k ≤ 19<br>-18 ≤ l ≤ 18                   | -11 ≤ h ≤ 11<br>-12 ≤ k ≤ 12<br>-13 ≤ l ≤ 13                   |
| Reflections collected / unique                 | 28454 / 4210 [R(int) = 0.0477]                                 | 17741/4059 [R(int) = 0.1186]                                   |
| Completeness to theta = 25.242, %              | 99.8                                                           | 99.8                                                           |
| Absorption correction                          | Semi-empirical from equivalents                                | Analytical                                                     |
| Max. and min. transmission                     | 0.9582 and 0.8453                                              | 0.964 and 0.927                                                |
| Refinement method                              | Full-matrix least-squares on F <sup>2</sup>                    | Full-matrix least-squares on F <sup>2</sup>                    |
| Data / restraints / parameters                 | 4210 / 0 / 258                                                 | 4059 / 0 / 243                                                 |
| Goodness-of-fit on F <sup>2</sup>              | 1.070                                                          | 1.039                                                          |
| Final R indices [I>2sigma(I)]                  | R1 = 0.0468, wR2 = 0.1236                                      | R1 = 0.0522, wR2 = 0.1237                                      |
| R indices (all data)                           | R1 = 0.0625, wR2 = 0.1321                                      | R1 = 0.0677, wR2 = 0.1354                                      |
| Largest diff. peak and hole, e·Å <sup>-3</sup> | 0.225 and -0.271                                               | 0.314 and -0.331                                               |
